# Supplementary material for: Flexible porphyrin tetracarboxylic acids for crystal engineering
Source: Royal Society of Chemistry journal article supplement (doi:10.1039/c0ce00510j), 2010-01-01

**ELECTRONIC SUPPLEMENTARY INFORMATION**  
(for manuscript CE-COM-08-2010-000510)

**Flexible porphyrin tetracarboxylic acids for crystal engineering**

Anirban Karmakar and Israel Goldberg\*

*School of Chemistry, Sackler Faculty of Exact Sciences, Tel Aviv University,  
Ramat Aviv, 69978 Tel-Aviv, Israel.*

E-mail addresses: [anirban@iitg.ernet.in](mailto:anirban@iitg.ernet.in), [goldberg@post.tau.ac.il](mailto:goldberg@post.tau.ac.il)

## Materials preparation

### Synthesis of tetrakis[4-(carboxymethyleneoxy)phenyl]porphyrin

The title compound, tetrakis[4-(carboxymethyleneoxy)phenyl]porphyrin was prepared by a three step procedure. The first step involves synthesis of Methyl-2-(4-formylphenoxy) acetate. Then, in the second step we synthesized the methyl ester of tetrakis[4-(carboxymethyleneoxy)phenyl]porphyrin, and finally the third step is the conversion of methyl ester into the carboxyporphyrin by alkaline hydrolysis.

#### STEP 1: Synthesis of Methyl-2-(4-formylphenoxy) acetate:

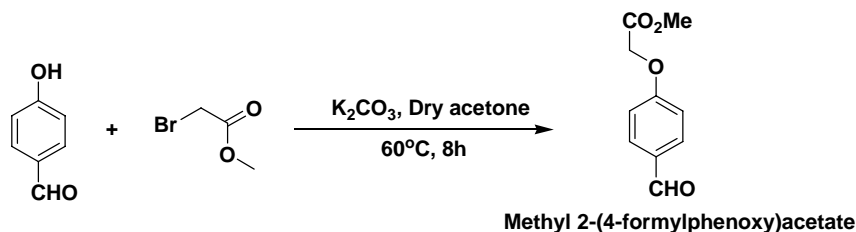

4-Hydroxybenzaldehyde (2.44 g, 20 mmol), methyl bromoacetate (3.34 g, 22 mmol) and anhydrous K<sub>2</sub>CO<sub>3</sub> (1.65 g, 12 mmol) were placed in a round bottom flask and then added dry acetone (20ml). The reaction mixture was stirred for 8h at 60°C (the reaction progress being monitored at regular intervals by TLC). After completion of the reaction, it was filtered off (to remove unreacted K<sub>2</sub>CO<sub>3</sub>). The solvent was removed under reduced pressure and yellow liquid was obtained. The isolated product was washed with NaOH (5%) solution in water and then extracted with dichloromethane. The organic extracts were collected over anhydrous sodium sulphate; subsequent removal of the solvent gave the methyl-2-(4-formylphenoxy) acetate. Yield: 64%.

#### STEP 2: Synthesis of methyl ester of tetrakis[4-(carboxymethyleneoxy)phenyl] porphyrin

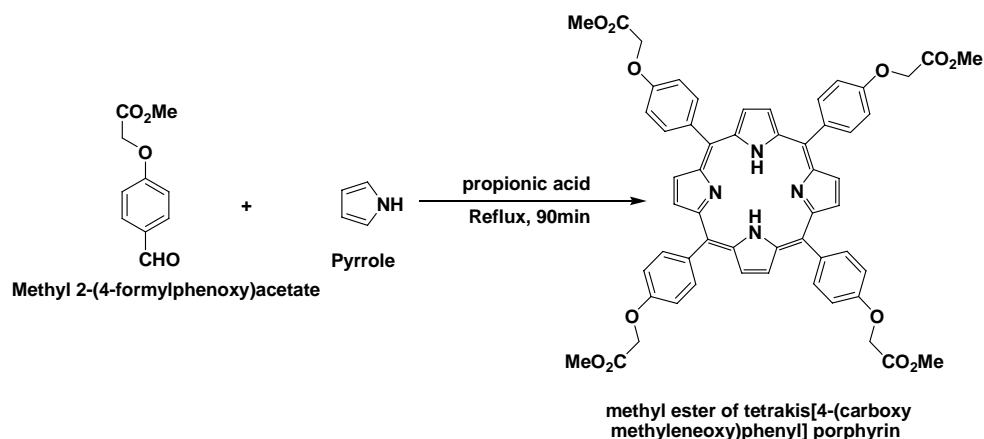

3.88 g (20mmol) of Methyl-2-(4-formylphenoxy) acetate was dissolved in 50ml of propionic acid and heated to 100°C. To this, 1.34g (20mmol) of distilled pyrrole was added. The resulting mixture was heated to refluxing for 90mins. Then, the mixture was cooled to RT and neutralized with  $K_2CO_3$ . The mixture was extracted with chloroform and the organic extracts were collected over anhydrous sodium sulphate; subsequent removal of the solvent gave black solid product. This product was dissolved in ethyl acetate and kept at RT for over night. The solid was filtered off and washed properly with ethyl acetate. The methyl ester of tetrakis[4-(carboxymethyleneoxy)phenyl]porphyrin was obtained as a purple solid. Yield = 11% (according to pyrrole). FT-IR ( $cm^{-1}$ ): 3371(b), 2946(w,  $\nu_{C-H}$ ), 1751(s,  $\nu_{C=O}$  asymmetric), 1602(s,  $\nu_{C=C}$ ), 1506(s,  $\nu_{C=C}$ ), 1431(m,  $\nu_{C=O}$  symmetric), 1295(m), 1214(m,  $\nu_{C-O}$ ), 1177(s), 1075(m), 974(w), 801(s), 710(w), 604(w).  $^1H$ -NMR ( $CDCl_3$ ): 8.78 (8H, s), 8.07 (8H, d,  $J=8.6Hz$ ), 7.23 (8H, d,  $J=8.6Hz$ ), 4.88 (8H, s), 3.89 (12H, s).

### STEP 3: Deesertification procedure

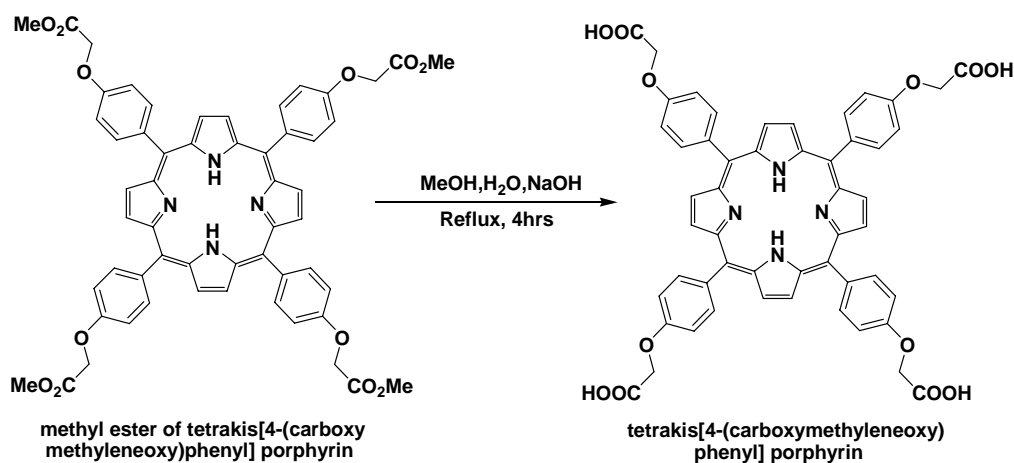

0.20 g (0.207mmol) of the porphyrin ester was dissolved in 20ml of methanol. To this, 0.067 g (1.65mmol) of NaOH in 2ml of water was added and heated at 75°C for 4 hours. The course of the reaction was monitored by thin layer chromatography (TLC). At the end of the reaction solvent was removed by rotary evaporation. The crude porphyrin was treated with 0.5 N HCl solution, yielding green precipitate which was filtered and washed with water several times and dried. Protonated porphyrin was neutralized by adding 5ml of pyridine. Solvent was removed by vacuum distillation. The bluish green solid was washed with water several times and dried under vacuum. Yield = 75%. FT-IR ( $\text{cm}^{-1}$ ): 3384(b), 2895(w,  $\nu_{\text{C-H}}$ ), 1729(s,  $\nu_{\text{C=O}}$  asymmetric), 1598(s,  $\nu_{\text{C=C}}$ ), 1491(s,  $\nu_{\text{C=C}}$ ), 1421(m,  $\nu_{\text{C=O}}$  symmetric), 1222(bm,  $\nu_{\text{C-O}}$ ), 1173(m), 1065(s), 820(s), 687(m), 598(w), 520(w).  $^1\text{H-NMR}$  ( $\text{DMSO-d}^6$ ): 8.85 (8H, s), 8.13 (8H, d,  $J=8.6\text{Hz}$ ), 7.36 (8H, d,  $J=8.6\text{Hz}$ ), 4.98 (8H, s).

### **Crystallization procedures.**

**1;** 10 mg of porphyrin ester was dissolved in 10 ml of 4:1 ethyl acetate/ hexane mixture (v/v) and kept it for slow evaporation. After 5 days purple plate type of crystals appeared.

**2';** 5 mg of tetrakis[4-(carboxymethyleneoxy)phenyl] porphyrin was dissolved in 3 ml of DMF and placed in a 8 ml capped glass vessel. This mixture was heated at 100°C for 2days. After cooling the sample to room temperature, it was kept for crystallization. After 2 months purple plate type crystals appeared.

**3:** A mixture of tetrakis[4-(carboxymethyleneoxy)phenyl]porphyrin (5.0 mg, 0.005 mmol), and  $\text{Cu}(\text{NO}_3)_2 \cdot 2\frac{1}{2}\text{H}_2\text{O}$  (3.5 mg, 0.015 mmol) was dissolved in 4 ml of MeOH/ $\text{NH}_4\text{OH}$  (2:1) mixture, placed in a capped glass vessel and heated at 85°C for 48h. After cooling the sample to room temperature, block-shaped red crystals appeared, which were washed with water and dried in air. Yield: 10% (based on Cu). FT-IR ( $\text{cm}^{-1}$ ): 3448(bm), 3343(bs), 2922(w,  $\nu_{\text{C-H}}$ ), 1602(s,  $\nu_{\text{C=O}}$  asymmetric), 1504(m), 1415(m,  $\nu_{\text{C=C}}$ ), 1388(s,  $\nu_{\text{C=O}}$  symmetric), 1340(w), 1229(s,  $\nu_{\text{C-O}}$ ), 1177(w), 1066(m), 1001(m), 803(s), 720(m), 610(w).

**4:** 9.1 mg (0.01 mmol) of tetrakis[4-(carboxymethyleneoxy)phenyl] porphyrin and 8.2 mg (0.03 mmol) of  $\text{Zn}(\text{NO}_3)_2 \cdot 6\text{H}_2\text{O}$  was dissolved in 2 ml of 3:1 DMF/EtOH mixture (v/v). To this, 0.05 ml of 1 N  $\text{HNO}_3$  was added. The green reaction mixture was placed in a sealed reactor and heated at 80°C for 24 hrs. Crystals suitable for X-ray

analysis were obtained upon cooling the reactor to ambient temperature. Yield: 24% (based on Zn). FT-IR ( $\text{cm}^{-1}$ ): 2925(w,  $\nu_{\text{C-H}}$ ), 1654(s,  $\nu_{\text{C=O}}$  asymmetric), 1506(m), 1421(m,  $\nu_{\text{C=C}}$ ), 1333(m,  $\nu_{\text{C=O}}$  symmetric), 1219(s,  $\nu_{\text{C-O}}$ ), 1174(m), 1104(w), 1064(m), 993(m), 848(m), 802(w), 719(w), 610(w).

### **Crystal Structure Determinations:**

The X-ray measurements (Nonius KappaCCD diffractometer,  $\text{MoK}\alpha$  radiation) were carried out at 110(2) K on crystals coated with a thin layer of amorphous oil to minimize crystal deterioration, possible structural disorder and related thermal motion effects, and to optimize the precision of the structural results. These structures were solved by direct methods (SIR-97) and refined by full-matrix least-squares (SHELXL-97). All non-hydrogen atoms were refined anisotropically. The hydrogen atoms attached to carbon were located in idealized/calculated positions and were refined using a riding model, with  $U_{\text{iso}} = 1.2 U_{\text{eq}}$  of the parent atom. Those attached to O and N atoms, which are involved in hydrogen bonding were located in difference-Fourier maps; then their O-H and N-H distances were restrained to common values. Crystallographic refinements of all the structures converged to acceptable R-values, representing precisely determined structural models of compounds **1**, **3** and **4** (and partly of **2'**), and allowing reliable characterizations of the molecular structures and supramolecular binding motifs.

## Crystallographic data for compound 2'.

**Atomic coordinates ( x 10<sup>4</sup>) and equivalent isotropic displacement parameters (Å<sup>2</sup> x 10<sup>3</sup>).**

U(eq) is defined as one third of the trace of the orthogonalized Uij tensor.

| Atom  | x        | y        | z       | U(eq) |
|-------|----------|----------|---------|-------|
| O(1)  | -951(4)  | 9412(4)  | 4021(3) | 56(1) |
| C(2)  | -809(6)  | 8600(6)  | 4319(4) | 50(2) |
| O(3)  | -1409(5) | 8241(5)  | 4852(4) | 84(2) |
| C(4)  | 165(6)   | 8006(5)  | 4017(4) | 49(2) |
| O(5)  | 214(3)   | 8156(3)  | 3197(2) | 43(1) |
| C(6)  | 941(5)   | 7612(4)  | 2779(4) | 37(2) |
| C(7)  | 1801(5)  | 7042(4)  | 3100(4) | 39(2) |
| C(8)  | 2513(5)  | 6555(4)  | 2606(4) | 37(2) |
| C(9)  | 2381(5)  | 6615(4)  | 1801(4) | 35(1) |
| C(10) | 1495(5)  | 7171(5)  | 1504(4) | 41(2) |
| C(11) | 784(5)   | 7669(5)  | 1981(4) | 39(2) |
| C(12) | 3183(5)  | 6117(4)  | 1269(3) | 33(1) |
| C(13) | 6235(5)  | 3292(4)  | -731(3) | 33(1) |
| C(14) | 6295(5)  | 2291(4)  | -652(4) | 35(1) |
| C(15) | 5642(5)  | 2013(4)  | -50(4)  | 36(1) |
| C(16) | 5107(5)  | 2827(4)  | 250(4)  | 36(1) |
| N(17) | 5479(4)  | 3606(4)  | -175(3) | 36(1) |
| C(18) | 4298(5)  | 2843(4)  | 859(4)  | 37(2) |
| C(19) | 3983(5)  | 1910(4)  | 1215(4) | 35(1) |
| C(20) | 4347(6)  | 1585(5)  | 1949(5) | 53(2) |
| C(21) | 4101(6)  | 715(5)   | 2271(4) | 49(2) |
| C(22) | 3422(5)  | 137(4)   | 1890(4) | 36(2) |
| C(23) | 3057(6)  | 449(5)   | 1159(4) | 56(2) |
| C(24) | 3322(6)  | 1304(5)  | 834(4)  | 54(2) |
| O(25) | 3113(4)  | -728(3)  | 2164(3) | 42(1) |
| C(26) | 3754(6)  | -1169(5) | 2781(4) | 44(2) |
| C(27) | 3443(6)  | -881(5)  | 3591(4) | 47(2) |
| O(28) | 2565(4)  | -421(3)  | 3716(3) | 51(1) |
| O(29) | 4104(5)  | -1157(4) | 4112(3) | 74(2) |
| C(30) | 3763(5)  | 3656(4)  | 1127(4) | 37(2) |
| C(31) | 2854(5)  | 3641(5)  | 1690(4) | 42(2) |
| C(32) | 2547(5)  | 4544(4)  | 1800(4) | 40(2) |
| C(33) | 3234(5)  | 5138(4)  | 1318(4) | 36(2) |
| N(34) | 3962(4)  | 4566(4)  | 906(3)  | 36(1) |
| O(35) | 7805(4)  | 5162(4)  | 3632(3) | 62(2) |
| C(36) | 8607(6)  | 5648(5)  | 3443(4) | 46(2) |
| O(37) | 9331(5)  | 5878(4)  | 3900(3) | 76(2) |
| C(38) | 8745(6)  | 6021(5)  | 2603(4) | 42(2) |
| O(39) | 8040(4)  | 5632(3)  | 2062(3) | 44(1) |
| C(40) | 8367(5)  | 4766(4)  | 1785(4) | 38(2) |
| C(41) | 9244(6)  | 4209(5)  | 2069(4) | 45(2) |
| C(42) | 9483(5)  | 3344(5)  | 1742(4) | 44(2) |
| C(43) | 8883(5)  | 3029(4)  | 1151(4) | 35(1) |
| C(44) | 7981(5)  | 3599(5)  | 878(4)  | 44(2) |
| C(45) | 7750(5)  | 4461(5)  | 1177(4) | 43(2) |
| C(46) | 9183(5)  | 2105(4)  | 789(4)  | 36(2) |
| C(47) | 8584(5)  | 1310(4)  | 995(4)  | 37(2) |

|       |          |          |         |        |
|-------|----------|----------|---------|--------|
| C(48) | 7633(5)  | 1318(5)  | 1521(4) | 41(2)  |
| C(49) | 7316(5)  | 429(5)   | 1622(4) | 40(2)  |
| C(50) | 8058(5)  | -150(4)  | 1156(3) | 33(1)  |
| N(51) | 8803(4)  | 415(4)   | 765(3)  | 36(1)  |
| C(52) | 8007(4)  | -1132(4) | 1141(3) | 31(1)  |
| C(53) | 7288(5)  | -1635(4) | 1727(3) | 33(1)  |
| C(54) | 6459(5)  | -2224(5) | 1534(3) | 36(2)  |
| C(55) | 5862(5)  | -2727(5) | 2091(4) | 37(2)  |
| C(56) | 6083(5)  | -2641(5) | 2884(4) | 37(2)  |
| C(57) | 6901(5)  | -2062(4) | 3096(3) | 36(2)  |
| C(58) | 7489(5)  | -1563(4) | 2525(4) | 37(2)  |
| O(59) | 5434(4)  | -3161(3) | 3390(3) | 46(1)  |
| C(60) | 5595(6)  | -3031(5) | 4193(4) | 50(2)  |
| C(61) | 4720(7)  | -3499(6) | 4693(5) | 60(2)  |
| O(62) | 3984(5)  | -3917(5) | 4399(3) | 79(2)  |
| O(63) | 4830(5)  | -3376(5) | 5429(3) | 76(2)  |
| C(64) | 8657(4)  | -1699(4) | 640(3)  | 30(1)  |
| C(65) | 8609(5)  | -2696(4) | 589(3)  | 33(1)  |
| C(66) | 9362(5)  | -2946(5) | 22(4)   | 38(2)  |
| C(67) | 10102(5) | 2133(4)  | 274(4)  | 36(2)  |
| N(68) | 9428(4)  | -1375(4) | 112(3)  | 34(1)  |
| C(69) | 2225(9)  | 4501(8)  | 4315(7) | 99(3)  |
| N(70) | 1416(8)  | 3882(9)  | 4577(6) | 130(4) |
| C(71) | 516(8)   | 3655(8)  | 4113(5) | 84(3)  |
| C(72) | 622(8)   | 1220(6)  | 3368(6) | 82(3)  |
| N(73) | 656(5)   | 255(4)   | 3087(3) | 53(2)  |
| C(74) | 421(8)   | 247(6)   | 2252(5) | 70(2)  |
| C(75) | 7426(7)  | 1358(6)  | 4281(5) | 68(2)  |
| N(76) | 7225(6)  | 415(5)   | 4578(4) | 67(2)  |
| C(77) | 6243(7)  | -16(8)   | 4297(7) | 94(3)  |
| C(78) | 5041(7)  | 4646(6)  | 2868(5) | 66(2)  |
| N(79) | 6016(5)  | 4231(4)  | 3283(3) | 47(1)  |
| C(80) | 6483(7)  | 3372(6)  | 2927(5) | 66(2)  |
| C(81) | 4297(7)  | 1863(6)  | 4163(6) | 72(3)  |
| N(82) | 3324(12) | 1846(12) | 3891(9) | 194(7) |
| C(83) | 2878(8)  | 2614(7)  | 3608(6) | 75(3)  |
| O(84) | 2049(5)  | 6455(5)  | 5336(4) | 98(2)  |

---

| Atom | x | y | z | U(eq) |
|------|---|---|---|-------|
|------|---|---|---|-------|

---

|        |      |       |      |    |
|--------|------|-------|------|----|
| H(4A)  | 861  | 8195  | 4248 | 58 |
| H(4B)  | 64   | 7329  | 4159 | 58 |
| H(7)   | 1896 | 6989  | 3649 | 46 |
| H(8)   | 3104 | 6171  | 2822 | 44 |
| H(10)  | 1379 | 7207  | 957  | 49 |
| H(11)  | 190  | 8048  | 1765 | 46 |
| H(14)  | 6727 | 1886  | -972 | 42 |
| H(15)  | 5553 | 1380  | 142  | 43 |
| H(20)  | 4784 | 1982  | 2237 | 64 |
| H(21)  | 4399 | 507   | 2761 | 58 |
| H(23)  | 2610 | 54    | 878  | 67 |
| H(24)  | 3049 | 1494  | 333  | 65 |
| H(26A) | 4540 | -1029 | 2680 | 52 |
| H(26B) | 3690 | -1862 | 2766 | 52 |
| H(31)  | 2537 | 3097  | 1935 | 50 |
| H(32)  | 1971 | 4754  | 2141 | 48 |
| H(34)  | 4464 | 4758  | 562  | 43 |

|        |       |       |      |     |
|--------|-------|-------|------|-----|
| H(38A) | 8610  | 6714  | 2584 | 50  |
| H(38B) | 9522  | 5896  | 2434 | 50  |
| H(41)  | 9677  | 4412  | 2480 | 54  |
| H(42)  | 10086 | 2960  | 1938 | 53  |
| H(44)  | 7528  | 3384  | 482  | 53  |
| H(45)  | 7164  | 4855  | 968  | 52  |
| H(48)  | 7297  | 1855  | 1751 | 49  |
| H(49)  | 6715  | 216   | 1941 | 48  |
| H(54)  | 6298  | -2282 | 1000 | 44  |
| H(55)  | 5304  | -3130 | 1941 | 44  |
| H(57)  | 7061  | -2007 | 3631 | 43  |
| H(58)  | 8046  | -1159 | 2676 | 44  |
| H(60A) | 5576  | -2347 | 4284 | 60  |
| H(60B) | 6333  | -3298 | 4344 | 60  |
| H(65)  | 8145  | -3106 | 889  | 40  |
| H(66)  | 9502  | -3568 | -145 | 46  |
| H(68)  | 9601  | -782  | 29   | 41  |
| H(69A) | 2632  | 4239  | 3871 | 148 |
| H(69B) | 2739  | 4588  | 4738 | 148 |
| H(69C) | 1874  | 5112  | 4153 | 148 |
| H(70A) | 1114  | 4117  | 5027 | 155 |
| H(70B) | 1780  | 3321  | 4720 | 155 |
| H(71A) | 47    | 4223  | 4003 | 126 |
| H(71B) | 80    | 3174  | 4395 | 126 |
| H(71C) | 799   | 3409  | 3621 | 126 |
| H(72A) | 1132  | 1608  | 3052 | 123 |
| H(72B) | 842   | 1199  | 3915 | 123 |
| H(72C) | -132  | 1495  | 3324 | 123 |
| H(73A) | 1345  | -22   | 3177 | 64  |
| H(73B) | 145   | -96   | 3365 | 64  |
| H(74A) | -344  | 474   | 2163 | 105 |
| H(74B) | 523   | -398  | 2078 | 105 |
| H(74C) | 928   | 661   | 1957 | 105 |
| H(75A) | 7454  | 1375  | 3709 | 103 |
| H(75B) | 8133  | 1556  | 4475 | 103 |
| H(75C) | 6828  | 1788  | 4456 | 103 |
| H(76A) | 7171  | 419   | 5113 | 80  |
| H(76B) | 7833  | 35    | 4457 | 80  |
| H(77A) | 5590  | 394   | 4396 | 142 |
| H(77B) | 6154  | -632  | 4571 | 142 |
| H(77C) | 6326  | -100  | 3735 | 142 |
| H(78A) | 5261  | 4853  | 2336 | 99  |
| H(78B) | 4738  | 5188  | 3145 | 99  |
| H(78C) | 4477  | 4171  | 2848 | 99  |
| H(79A) | 6552  | 4673  | 3283 | 56  |
| H(79B) | 5817  | 4083  | 3793 | 56  |
| H(80A) | 5931  | 2884  | 2954 | 99  |
| H(80B) | 7143  | 3141  | 3211 | 99  |
| H(80C) | 6685  | 3522  | 2380 | 99  |
| H(81A) | 4761  | 2245  | 3806 | 108 |
| H(81B) | 4615  | 1218  | 4217 | 108 |
| H(81C) | 4260  | 2140  | 4675 | 108 |
| H(82A) | 2865  | 1618  | 4285 | 232 |
| H(82B) | 3341  | 1417  | 3507 | 232 |
| H(83A) | 3328  | 3145  | 3730 | 112 |
| H(83B) | 2133  | 2704  | 3836 | 112 |
| H(83C) | 2828  | 2585  | 3041 | 112 |

---



**Table of hydrogen bonds (Å, °).**

| <u>D-H</u> | <u>d(D-H)</u> | <u>d(H..A)</u> | <u>&lt;DHA</u> | <u>d(D..A)</u> | <u>A [symmetry site]</u> | <u>.</u> |
|------------|---------------|----------------|----------------|----------------|--------------------------|----------|
| N70-H70A   | 0.920         | 1.909          | 158            | 2.782          | O37 [ -x+1, -y+1, -z+1 ] |          |
| N70-H70B   | 0.920         | 2.355          | 141            | 3.120          | O3 [ -x, -y+1, -z+1 ]    |          |
| N73-H73A   | 0.920         | 1.813          | 158            | 2.690          | O28                      |          |
| N73-H73B   | 0.920         | 1.856          | 169            | 2.764          | O1 [ x, y-1, z ]         |          |
| N73-H73B   | 0.920         | 2.510          | 117            | 3.043          | O5 [ x, y-1, z ]         |          |
| N76-H76A   | 0.920         | 2.041          | 167            | 2.945          | O28 [ -x+1, -y, -z+1 ]   |          |
| N76-H76A   | 0.920         | 2.275          | 130            | 2.952          | O29 [ -x+1, -y, -z+1 ]   |          |
| N76-H76B   | 0.920         | 1.851          | 168            | 2.758          | O1 [ x+1, y-1, z ]       |          |
| N79-H79A   | 0.920         | 1.815          | 154            | 2.673          | O35                      |          |
| N79-H79B   | 0.920         | 1.811          | 155            | 2.671          | O63 [ -x+1, -y, -z+1 ]   |          |
| N82-H82A   | 0.920         | 2.286          | 153            | 3.133          | O3 [ -x, -y+1, -z+1 ]    |          |
| N82-H82B   | 0.920         |                |                |                |                          |          |

---

## Powder diffraction diagrams for compound 4

Experimental (top) and structure-calculated (bottom) powder diffraction diagrams

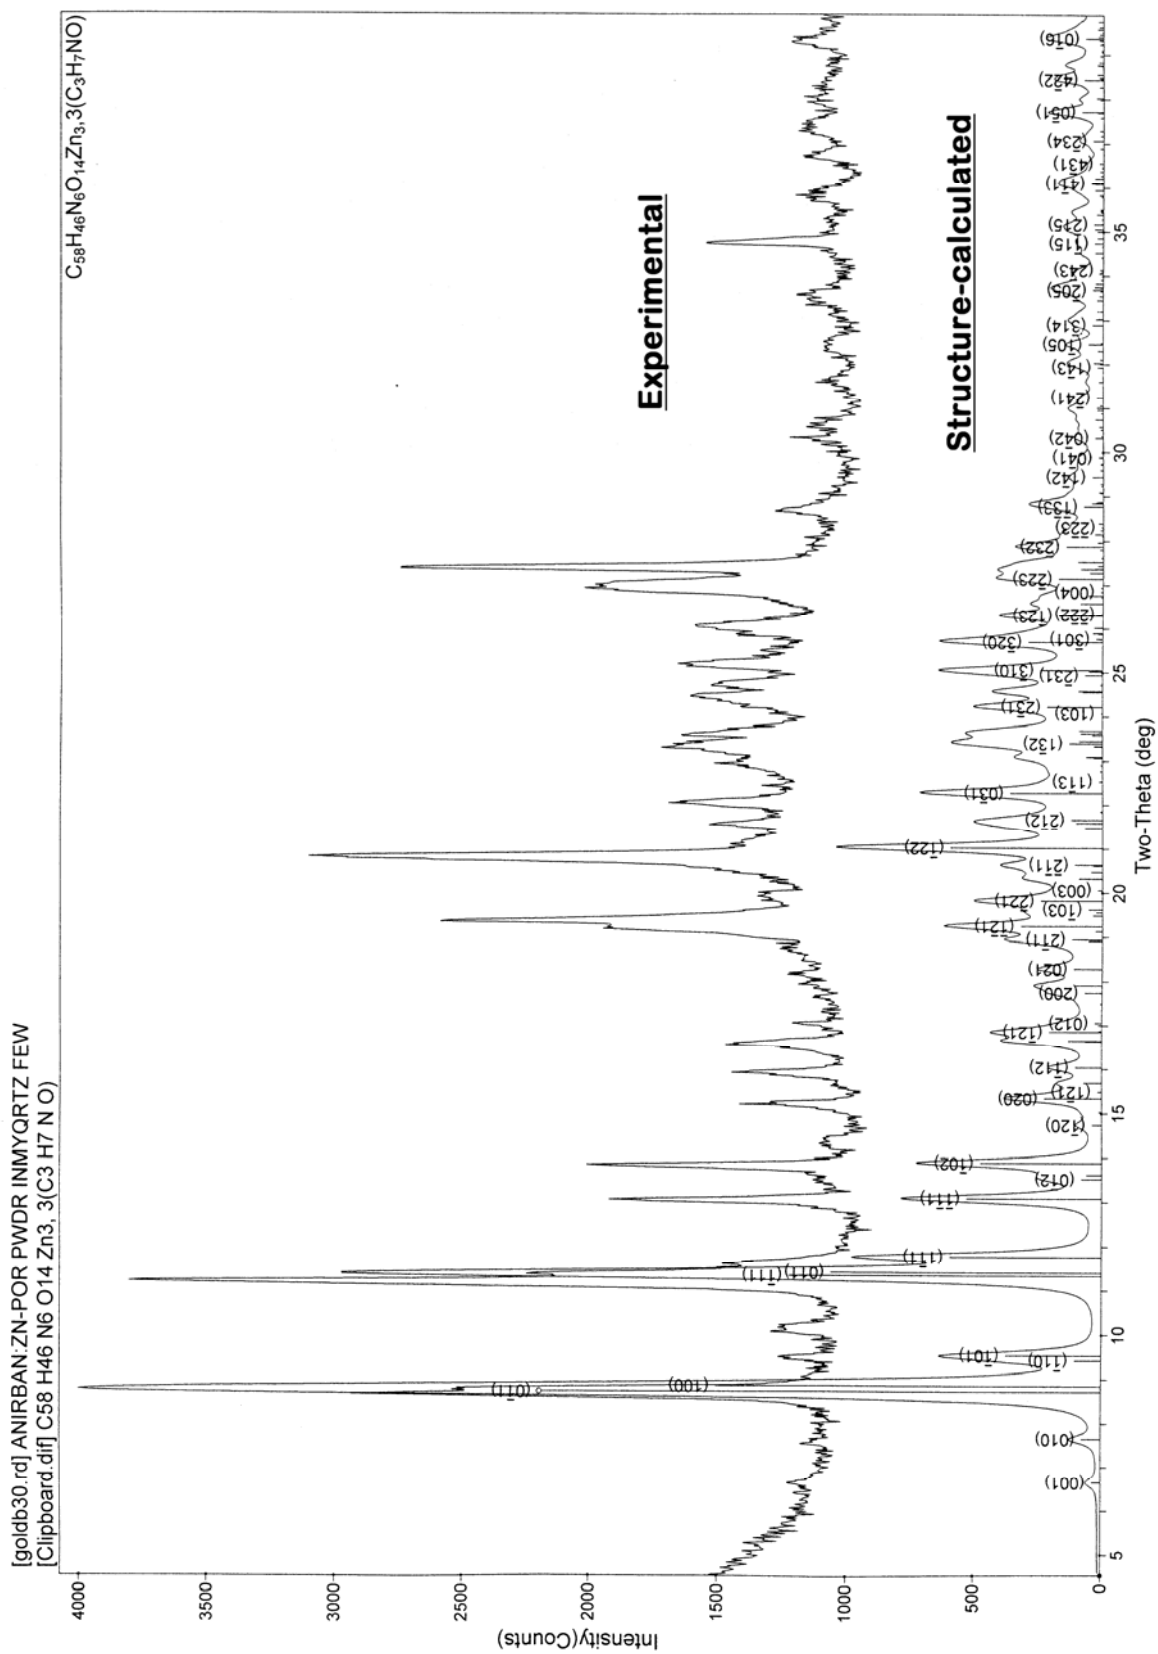

Supplement: c0ce00510j1.pdf [file c0ce00510j1.pdf]
